# Supplementary material for: An all-organic rechargeable battery using bipolar polyparaphenylene as a redox-active cathode and anode
Source: Royal Society of Chemistry journal article supplement (doi:10.1039/c2cc36622c), 2012-11-26
Supplement: c2cc36622c.pdf [file c2cc36622c.pdf]

## Electronic Supplementary Information (ESI)

### An All-organic Rechargeable Battery Using Bipolar polyparaphenylene as Redox-active Cathode and Anode

L. M. Zhu, A. W. Lei, Y. L. Cao, X. P. Ai, H. X. Yang\*

College of Chemistry and Molecular Science, Wuhan University, Wuhan 430072, China.

\* Corresponding author: E-mail: [hxyang@whu.edu.cn](mailto:hxyang@whu.edu.cn)

#### 1. Experimental details

**Materials preparation.** Poly (p-phenylene) (PPP) was prepared using aluminium chloride - cupric chloride as catalyst according to Kovacic's method.<sup>1</sup> The synthetic route was showed in Scheme 1. Firstly, benzene (0.78g, 10 mmol) was added dropwise into anhydrous AlCl<sub>3</sub> (0.334g, 2.5 mmol) and CuCl<sub>2</sub> (0.336g, 2.5 mmol) at 0 °C and the reaction mixture were stirred for 1 hour. This solution was then stirred for 2 hours at room temperature. The resulting mixture was filtered and subsequently the polymeric precipitate was washed several times with hot 18% hydrochloric acid solution and finally dried at 60 °C under vacuum for 24 h to give brown powder. The as-prepared PPP was further heat-treated in a muffle furnace for 36 h at 400 °C.

All chemicals were purchased from commercial sources and used without further purification unless except otherwise noted.

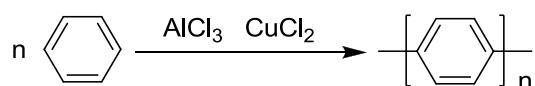

**Scheme 1.** Synthetic route of PPP

**Structural and electrochemical characterizations.** The crystalline structure of the PPP polymer was characterized by powder X-ray diffractometry (XRD) on a Shimadzu XRD-6000 diffractometer with CuK $\alpha$  source. The FT-IR spectra of PPP were recorded on a NICOLET AVATAR360 FT-IR spectrometer with KBr pellets. The particle morphology of PPP powder was examined by scanning electron microscopy (SEM) on a Sirion 2000 machine (Holland).

Cyclic voltammeter (CV) was performed with a powder microelectrode using a two-electrode cell, a larger lithium sheet served as both counter electrode and reference electrode. The CVs were recorded using a CHI 660C electrochemical workstation (Shanghai, China). The charge - discharge measurements were carried out using 2016 type coin cells. The cells were assembled in an argon-filled glove box, using a Li metal disc as the negative electrode and a Whatman GF/D borosilicate glass fiber sheet saturated with 1mol L<sup>-1</sup> LiPF<sub>6</sub> in ethylene Carbonate (EC), dimethyl carbonate (DMC) and ethyl methyl carbonate (EMC) (1:1:1 w/w/w) as the electrolyte. The PPP electrode film was consisted of 70% PPP powder, 20% acetylene black, 10% PTFE (wt.%) and prepared by roll-pressing the mixture into an thick film and then pressing the film onto an collector. The charge - discharge experiments were executed using a programmable computer-controlled battery charger (LAND CT2001A, Wuhan, China).

## 2. The XRD spectra of the PPP samples

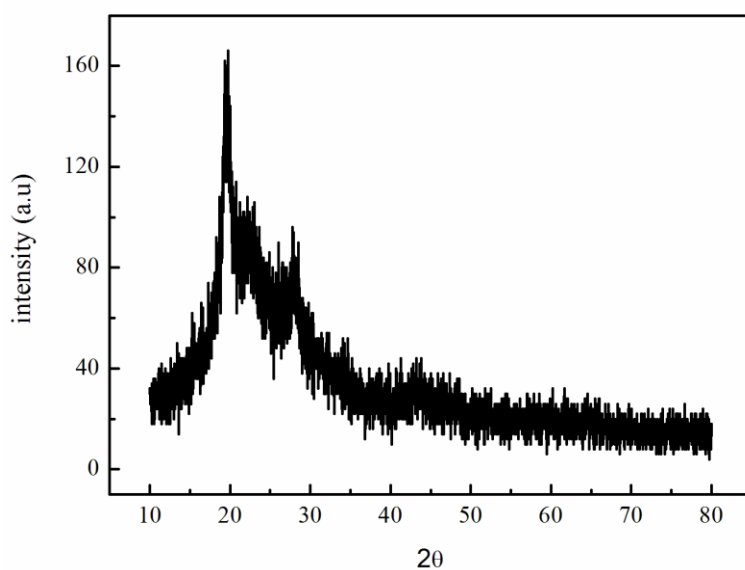

**Figure S1.** The XRD spectra of the PPP samples

## 3. Cycling capacities of coin-type Li- PPP cells at various charge-discharge rates

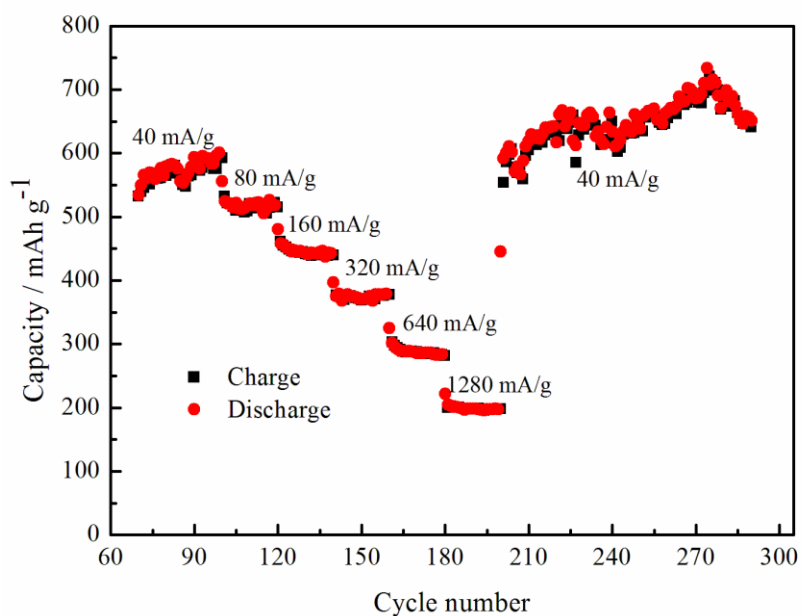

**Figure S2.** Cycling capacities of coin-type Li- PPP cells at various charge-discharge rates as labeled in the figure.
